# Supplementary material for: LinkExplorer: Predicting, explaining and exploring links in large biomedical knowledge graphs
Source: bioRxiv or medRxiv preprint supplement (doi:10.1101/2022.01.09.475537), 2022-01-31
Supplement: Supplementary file [file media-1.pdf]

LinkExplorer: Predicting, explaining and  
exploring links in large biomedical knowledge  
graphs

Supplementary data

# 1 Statistics on datasets

|              | Entities | Relations | Training  | Testing | Validation |
|--------------|----------|-----------|-----------|---------|------------|
| OpenBioLink  | 184,635  | 28        | 4,192,002 | 183,009 | 180,964    |
| PheKnowLator | 737,556  | 294       | 4,952,471 | 274,497 | 260,775    |
| Hetionet     | 45,158   | 24        | 2,030,777 | 112,524 | 106,896    |
| ogbl-biokg   | 93,773   | 51        | 4,762,678 | 162,870 | 162,886    |

Table 1: Dataset statistics: Number of entities, relations and triples of each dataset.

|              | M-1 | 1-N | M-N | 1-1 |
|--------------|-----|-----|-----|-----|
| OpenBioLink  | 2   | -   | 25  | 1   |
| PheKnowLator | 63  | 6   | 19  | 206 |
| Hetionet     | -   | 3   | 21  | -   |
| ogbl-biokg   | -   | -   | 51  | -   |

Table 2: Number of relation types within each dataset. We use the same approach for classifying relationships as in [Bordes et al., 2013], where four different relationship type classes were used: 1-1, 1-many, many-1, many-many. A relationship is 1-1 if there is at most one tail for each head in the training set and vice versa. A relationship is classified as 1-many if there appear multiple tails with a head, many-1 if there appear multiple heads with a tail and many-many if multiple heads appear with multiple tails. Classes were determined by calculating the average number of tails  $t$  (heads  $h$ ) that appear given a pair  $(h, r)$   $((t, r))$  in the training set, A threshold of 1.5 average entities was used above which the argument is labeled as many.

| Type | Relation                                  | # Avg. head | # Avg. tail |
|------|-------------------------------------------|-------------|-------------|
| 1-N  | Disease - upregulates - Gene              | 1.35        | 158.55      |
|      | Disease - downregulates - Gene            | 1.29        | 159.95      |
|      | Pharmacologic Class - includes - Compound | 1.37        | 2.83        |
| M-N  | Gene - interacts - Gene                   | 9.66        | 14.28       |
|      | Anatomy - expresses - Gene                | 26.34       | 1979.5      |
|      | Disease - presents - Symptom              | 7.37        | 22.77       |

Table 3: Examples of relationships of type 1-N and type M-N of Hetionet and their average number of heads per tail and average number of tails per head which lead to their classification.

| Type | Relation                    | # Avg. head | # Avg. tail |
|------|-----------------------------|-------------|-------------|
| M-1  | IS_A                        | 4.23        | 1.48        |
|      | PART_OF                     | 2.5         | 1.07        |
| M-N  | GENE_UNDEREXPRESSED_ANATOMY | 1202.23     | 7.28        |
|      | GENE_PHENOTYPE              | 19.54       | 34.39       |
|      | DRUG_ACTIVATION_GENE        | 4.98        | 3.78        |
| 1-1  | GENE_EXPRESSION_GENE        | 1.11        | 1.08        |

Table 4: Examples of relations of different types appearing in OpenBioLink and their average number of heads per tail and average number of tails per head which lead to their classification.

## 2 Results for FB15K-237

|               |           | FB15K-237 |                   |                   |                   |
|---------------|-----------|-----------|-------------------|-------------------|-------------------|
|               |           | Approach  | MRR               | hits@1            | hits@10           |
| Latent        | RESCAL    | ★         | .357              | .263              | .541              |
|               | TransE    | ★         | .313              | .221              | .497              |
|               | DistMult  | ★         | .343              | .250              | .531              |
|               | ComplEx   | ★         | .348              | .253              | .534              |
|               | ConvE     | ★         | .339              | .248              | .521              |
|               | RotatE    | ♣         | .336              | .238              | .531              |
|               | Tucker    | ♣         | .352              | .259              | .536              |
|               | HAKE      | ▽         | .346              | .250              | <b>.542</b>       |
| Interpretable | C-NN      | △         | .296              | .222              | .446              |
|               | DRUM      | ‡         | .343 <sup>†</sup> | .255 <sup>†</sup> | .516 <sup>†</sup> |
|               | Neural LP | ◇         | .240 <sup>†</sup> |                   | .362 <sup>†</sup> |
|               | GPFL      | ◇         | .322              | .247              | .504              |
|               | AMIE+     | ♣         |                   | .174              | .409              |
|               | RuleN     | ♣         |                   | .182              | .420              |
|               | RLvLR     | ‡         | .240              |                   | .393              |
|               | SAFRAN*   |           | <b>.389</b>       | <b>.298</b>       | .537              |

Table 5: MRR, Hits@1, Hits@10 results for FB15K-237. Best results for each metric and dataset are marked in bold. \*Denotes our approach. <sup>†</sup>Results were evaluated with top policy for dealing with same score entities and are not directly comparable to other approaches. Results marked with ★ are from [Ruffinelli et al., 2020], ♣ from [Rossi et al., 2021], △ from [Ferré, 2020], ‡ from [Sadeghian et al., 2019], ◇ from [Gu et al., 2020], ♣ from [Meilicke et al., 2019], ‡ from [Omran et al., 2018] and ▽ from [Zhang et al., 2020].

### 3 Hyperparameter search of embedding models

| Hyperparameter                   | Range                          |
|----------------------------------|--------------------------------|
| Embedding size                   | 128                            |
| Training type                    | NegSamp                        |
| # head samples                   | [0, 10000]                     |
| # tail samples                   | [0, 10000]                     |
| Loss                             | CE                             |
| $L_p$ norm (TransE)              | {1, 2}                         |
| Optimizer                        | Adagrad                        |
| Batch size                       | 1024                           |
| Learning rate                    | $[3 * 10^{-4}, 1]$ , log scale |
| LR scheduler patience            | [0, 10]                        |
| $L_p$ regularization             | {1, 2, 3, None}                |
| Entity emb. weight               | $[10^{-20}, 10^{-1}]$          |
| Relation emb. weight             | $[10^{-20}, 10^{-1}]$          |
| Frequency weighting              | True                           |
| Embedding normalization (TransE) |                                |
| Entity                           | {True, False}                  |
| Relation                         | {True, False}                  |
| Dropout                          |                                |
| Entity embedding                 | [0.0, 0.5]                     |
| Relation embedding               | [0.0, 0.5]                     |
| Feature map (ConvE)              | [0.0, 0.5]                     |
| Projection (ConvE)               | [0.0, 0.5]                     |
| Embedding initialization         | {Normal, Unif, XvNorm, XvUnif} |
| Std. deviation (normal)          | $[10^{-5}, 1.0]$ , log scale   |
| Interval (Unif)                  | [-1.0, 1.0]                    |
| Gain (XvNorm)                    | 1.0                            |
| Gain (XvUnif)                    | 1.0                            |

Table 6: Hyperparameter search space. We follow the naming conventions and ranges given by [Ruffinelli et al., 2020], however fixed some values due to the size of the datasets (training type: negative sampling, embedding size: 128, batch size: 1024, optimizer: Adagrad, regularization: weighted). For the meaning of the parameters, we refer also to this publication. We selected the best configuration based on the MRR of the validation set after running 30 pseudo-random trials for 20 epochs. We retrained the configuration that performed best for a maximum 400 epochs (with an early stopping patience of 10).

|                                  | RESCAL       |               | TransE       |              | DistMult     |              | CompLex      |              | ConvE        |              | RotatE       |              |
|----------------------------------|--------------|---------------|--------------|--------------|--------------|--------------|--------------|--------------|--------------|--------------|--------------|--------------|
| Embedding size                   | 128          | 128           | 128          | 128          | 128          | 128          | 128          | 128          | 128          | 128          | 128          | 128          |
| Training type                    | NegSamp      | NegSamp       | NegSamp      | NegSamp      | NegSamp      | NegSamp      | NegSamp      | NegSamp      | NegSamp      | NegSamp      | NegSamp      | NegSamp      |
| Reciprocal                       | No           | No            | No           | No           | No           | No           | No           | No           | Yes          | Yes          | No           | No           |
| No. subject samples (NegSamp)    | 7336         | 2539          | 7336         | 7336         | 7336         | 7336         | 7336         | 7336         | 7986         | 7986         | 2687         | 2687         |
| No. object samples (NegSamp)     | 5160         | 7092          | 5160         | 5160         | 5160         | 5160         | 5160         | 5160         | 1325         | 1325         | 2804         | 2804         |
| Label Smoothing (KvsAll)         | -            | -             | -            | -            | -            | -            | -            | -            | -            | -            | -            | -            |
| Loss                             | CE           | CE            | CE           | CE           | CE           | CE           | CE           | CE           | CE           | CE           | CE           | CE           |
| Margin (MR)                      | -            | -             | -            | -            | -            | -            | -            | -            | -            | -            | -            | -            |
| $L_p$ -norm (TransE)             | -            | L1            | -            | -            | -            | -            | -            | -            | -            | -            | -            | -            |
| Optimizer                        | Adagrad      | Adagrad       | Adagrad      | Adagrad      | Adagrad      | Adagrad      | Adagrad      | Adagrad      | Adagrad      | Adagrad      | Adagrad      | Adagrad      |
| Batch size                       | 1024         | 1024          | 1024         | 1024         | 1024         | 1024         | 1024         | 1024         | 1024         | 1024         | 1024         | 1024         |
| Learning rate                    | 0.11374      | 0.08972       | 0.11374      | 0.11374      | 0.11374      | 0.11374      | 0.11374      | 0.11374      | 0.02525      | 0.02525      | 0.04883      | 0.04883      |
| Scheduler patience               | 8            | 4             | 8            | 8            | 8            | 8            | 8            | 8            | 3            | 3            | 6            | 6            |
| $L_p$ regularization             | L3           | L3            | L3           | L3           | L3           | L3           | L3           | L3           | L2           | L2           | L1           | L1           |
| Entity emb. weight               | $2.61^{-20}$ | $3.32^{-17}$  | $2.61^{-20}$ | $2.61^{-20}$ | $2.61^{-20}$ | $2.61^{-20}$ | $2.61^{-20}$ | $2.61^{-20}$ | $2.26^{-15}$ | $2.26^{-15}$ | $5.55^{-16}$ | $5.55^{-16}$ |
| Relation emb. weight             | $2.00^{-20}$ | $8.04^{-18}$  | $2.00^{-20}$ | $2.00^{-20}$ | $2.00^{-20}$ | $2.00^{-20}$ | $2.00^{-20}$ | $2.00^{-20}$ | $1.61^{-06}$ | $1.61^{-06}$ | $2.28^{-08}$ | $2.28^{-08}$ |
| Frequency weighting              | Yes          | Yes           | Yes          | Yes          | Yes          | Yes          | Yes          | Yes          | Yes          | Yes          | Yes          | Yes          |
| Embedding normalization (TransE) | -            | L2            | -            | -            | -            | -            | -            | -            | -            | -            | -            | -            |
| Entity                           | -            | No            | -            | -            | -            | -            | -            | -            | -            | -            | -            | -            |
| Relation                         | -            | -             | -            | -            | -            | -            | -            | -            | -            | -            | -            | -            |
| Dropout                          | -            | -             | -            | -            | -            | -            | -            | -            | -            | -            | -            | -            |
| Entity embedding                 | 0.00         | 0.00          | 0.00         | 0.00         | 0.00         | 0.00         | 0.00         | 0.00         | 0.00         | 0.00         | 0.00         | 0.00         |
| Relation embedding               | 0.27         | 0.00          | 0.27         | 0.27         | 0.27         | 0.27         | 0.27         | 0.27         | 0.00         | 0.00         | 0.00         | 0.00         |
| Projection (ConvE)               | -            | -             | -            | -            | -            | -            | -            | -            | 0.26         | 0.26         | -            | -            |
| Feature map (ConvE)              | -            | -             | -            | -            | -            | -            | -            | -            | 0.11         | 0.11         | -            | -            |
| Embedding initialization         | XvNorm       | Unif.         | XvNorm       | XvNorm       | XvNorm       | XvNorm       | XvNorm       | XvNorm       | XvUnif       | XvUnif       | XvUnif       | XvUnif       |
| Std. deviation (Normal)          | -            | -             | -            | -            | -            | -            | -            | -            | -            | -            | -            | -            |
| Interval (Unif)                  | -            | [-0.30, 0.30] | -            | -            | -            | -            | -            | -            | -            | -            | -            | -            |
| Gain (XvNorm)                    | -            | -             | -            | -            | -            | -            | -            | -            | 1.00         | 1.00         | 1.00         | 1.00         |
| Gain (XvUnif)                    | 1.00         | -             | 1.00         | 1.00         | 1.00         | 1.00         | 1.00         | 1.00         | -            | -            | -            | -            |

*Hetionet*

Table 7: Best link prediction hyperparameter configurations for each model on Hetionet

|                                  | RESCAL              |                     | TransE              |                     | DistMult            |                     | CompLex             |                     | ConvE               |                     | RotatE              |                     |
|----------------------------------|---------------------|---------------------|---------------------|---------------------|---------------------|---------------------|---------------------|---------------------|---------------------|---------------------|---------------------|---------------------|
| Embedding size                   | 128                 | 128                 | 128                 | 128                 | 128                 | 128                 | 128                 | 128                 | 128                 | 128                 | 128                 | 128                 |
| Training type                    | NegSamp             | NegSamp             | NegSamp             | NegSamp             | NegSamp             | NegSamp             | NegSamp             | NegSamp             | NegSamp             | NegSamp             | NegSamp             | NegSamp             |
| Reciprocal                       | No                  | No                  | No                  | No                  | No                  | No                  | No                  | No                  | Yes                 | Yes                 | No                  | No                  |
| No. subject samples (NegSamp)    | 8985                | 2539                | 9193                | 9193                | 9193                | 9193                | 9193                | 9281                | 9281                | 2687                | 2687                | 2687                |
| No. object samples (NegSamp)     | 7990                | 7092                | 9096                | 9096                | 9096                | 9096                | 9096                | 9430                | 9430                | 2804                | 2804                | 2804                |
| Label Smoothing (KvsAll)         | -                   | -                   | -                   | -                   | -                   | -                   | -                   | -                   | -                   | -                   | -                   | -                   |
| Loss                             | CE                  | CE                  | CE                  | CE                  | CE                  | CE                  | CE                  | CE                  | CE                  | CE                  | CE                  | CE                  |
| Margin (MR)                      | -                   | -                   | -                   | -                   | -                   | -                   | -                   | -                   | -                   | -                   | -                   | -                   |
| $L_p$ -norm (TransE)             | -                   | -                   | -                   | -                   | -                   | -                   | -                   | -                   | -                   | -                   | -                   | -                   |
| Optimizer                        | Adagrad             | Adagrad             | Adagrad             | Adagrad             | Adagrad             | Adagrad             | Adagrad             | Adagrad             | Adagrad             | Adagrad             | Adagrad             | Adagrad             |
| Batch size                       | 1024                | 1024                | 1024                | 1024                | 1024                | 1024                | 1024                | 1024                | 1024                | 1024                | 1024                | 1024                |
| Learning rate                    | 0.10137             | 0.08972             | 0.18781             | 0.18781             | 0.18781             | 0.18781             | 0.18781             | 0.05670             | 0.05670             | 0.04883             | 0.04883             | 0.04883             |
| Scheduler patience               | 1                   | 4                   | 2                   | 2                   | 2                   | 2                   | 2                   | 2                   | 2                   | 6                   | 6                   | 6                   |
| $L_p$ regularization             | L2                  | L3                  | L2                  | L2                  | L2                  | L2                  | L2                  | L2                  | L2                  | L1                  | L1                  | L1                  |
| Entity emb. weight               | 2.33 <sup>-02</sup> | 3.32 <sup>-17</sup> | 3.76 <sup>-19</sup> | 3.76 <sup>-19</sup> | 3.76 <sup>-19</sup> | 3.76 <sup>-19</sup> | 3.76 <sup>-19</sup> | 9.03 <sup>-20</sup> | 9.03 <sup>-20</sup> | 5.55 <sup>-16</sup> | 5.55 <sup>-16</sup> | 5.55 <sup>-16</sup> |
| Relation emb. weight             | 1.90 <sup>-07</sup> | 8.04 <sup>-18</sup> | 2.00 <sup>-20</sup> | 2.00 <sup>-20</sup> | 2.00 <sup>-20</sup> | 2.00 <sup>-20</sup> | 2.00 <sup>-20</sup> | 4.34 <sup>-16</sup> | 4.34 <sup>-16</sup> | 2.28 <sup>-08</sup> | 2.28 <sup>-08</sup> | 2.28 <sup>-08</sup> |
| Frequency weighting              | Yes                 | Yes                 | Yes                 | Yes                 | Yes                 | Yes                 | Yes                 | Yes                 | Yes                 | Yes                 | Yes                 | Yes                 |
| Embedding normalization (TransE) | -                   | -                   | -                   | -                   | -                   | -                   | -                   | -                   | -                   | -                   | -                   | -                   |
| Entity                           | -                   | L2                  | -                   | -                   | -                   | -                   | -                   | -                   | -                   | -                   | -                   | -                   |
| Relation                         | -                   | No                  | -                   | -                   | -                   | -                   | -                   | -                   | -                   | -                   | -                   | -                   |
| Dropout                          | -                   | -                   | -                   | -                   | -                   | -                   | -                   | -                   | -                   | -                   | -                   | -                   |
| Entity embedding                 | 0.00                | 0.00                | 0.00                | 0.00                | 0.00                | 0.00                | 0.00                | 0.00                | 0.00                | 0.00                | 0.00                | 0.00                |
| Relation embedding               | 0.00                | 0.00                | 0.49                | 0.49                | 0.49                | 0.49                | 0.49                | 0.41                | 0.41                | 0.00                | 0.00                | 0.00                |
| Projection (ConvE)               | -                   | -                   | -                   | -                   | -                   | -                   | -                   | 0.14                | 0.14                | -                   | -                   | -                   |
| Feature map (ConvE)              | -                   | -                   | -                   | -                   | -                   | -                   | -                   | 0.05                | 0.05                | -                   | -                   | -                   |
| Embedding initialization         | XvUnif              | Unif.               | Normal              | Normal              | Normal              | Normal              | Normal              | Normal              | Normal              | XvUnif              | XvUnif              | XvUnif              |
| Std. deviation (Normal)          | -                   | -                   | 0.00003             | 0.00003             | 0.00003             | 0.00003             | 0.00003             | 0.00003             | 0.00003             | -                   | -                   | -                   |
| Interval (Unif)                  | -                   | [-0.30, 0.30]       | -                   | -                   | -                   | -                   | -                   | -                   | -                   | -                   | -                   | -                   |
| Gain (XvNorm)                    | 1.00                | -                   | -                   | -                   | -                   | -                   | -                   | -                   | -                   | -                   | -                   | 1.00                |
| Gain (XvUnif)                    | -                   | -                   | -                   | -                   | -                   | -                   | -                   | -                   | -                   | -                   | -                   | -                   |

*PheKnowLator*

Table 8: Best link prediction hyperparameter configurations for each model on PheKnowLator

|                                  | RESICAL      |              | TransE       |              | DistMult     |              | CompLex      |              | ConvE        |              | RotatE       |              |
|----------------------------------|--------------|--------------|--------------|--------------|--------------|--------------|--------------|--------------|--------------|--------------|--------------|--------------|
| Embedding size                   | 128          | 128          | 128          | 128          | 128          | 128          | 128          | 128          | 128          | 128          | 128          | 128          |
| Training type                    | NegSamp      | NegSamp      | NegSamp      | NegSamp      | NegSamp      | NegSamp      | NegSamp      | NegSamp      | NegSamp      | NegSamp      | NegSamp      | NegSamp      |
| Reciprocal                       | No           | No           | No           | No           | No           | No           | No           | No           | Yes          | Yes          | No           | No           |
| No. subject samples (NegSamp)    | 8985         | 3791         | 3791         | 7712         | 7712         | 7712         | 7712         | 9281         | 9281         | 9281         | 8985         | 8985         |
| No. object samples (NegSamp)     | 7990         | 2876         | 2876         | 600          | 600          | 600          | 600          | 9430         | 9430         | 9430         | 7990         | 7990         |
| Label Smoothing (KvsAll)         | -            | -            | -            | -            | -            | -            | -            | -            | -            | -            | -            | -            |
| Loss                             | CE           | CE           | CE           | CE           | CE           | CE           | CE           | CE           | CE           | CE           | CE           | CE           |
| Margin (MR)                      | -            | -            | -            | -            | -            | -            | -            | -            | -            | -            | -            | -            |
| $L_p$ -norm (TransE)             | -            | -            | L1           | -            | -            | -            | -            | -            | -            | -            | -            | -            |
| Optimizer                        | Adagrad      | Adagrad      | Adagrad      | Adagrad      | Adagrad      | Adagrad      | Adagrad      | Adagrad      | Adagrad      | Adagrad      | Adagrad      | Adagrad      |
| Batch size                       | 1024         | 1024         | 1024         | 1024         | 1024         | 1024         | 1024         | 1024         | 1024         | 1024         | 1024         | 1024         |
| Learning rate                    | 0.10137      | 0.22584      | 0.22584      | 0.11374      | 0.11374      | 0.11374      | 0.11374      | 0.05670      | 0.05670      | 0.05670      | 0.10137      | 0.10137      |
| Scheduler patience               | 1            | 5            | 5            | 8            | 8            | 8            | 8            | 2            | 2            | 2            | 1            | 1            |
| $L_p$ regularization             | L2           | L1           | L1           | L2           | L2           | L2           | L2           | L2           | L2           | L2           | L2           | L2           |
| Entity emb. weight               | $2.33^{-02}$ | $2.03^{-16}$ | $2.03^{-16}$ | $2.61^{-20}$ | $2.61^{-20}$ | $2.61^{-20}$ | $2.61^{-20}$ | $9.03^{-20}$ | $9.03^{-20}$ | $9.03^{-20}$ | $2.33^{-02}$ | $2.33^{-02}$ |
| Relation emb. weight             | $1.90^{-07}$ | $1.75^{-10}$ | $1.75^{-10}$ | $8.48^{-07}$ | $8.48^{-07}$ | $8.48^{-07}$ | $8.48^{-07}$ | $4.34^{-16}$ | $4.34^{-16}$ | $4.34^{-16}$ | $1.90^{-07}$ | $1.90^{-07}$ |
| Frequency weighting              | Yes          | Yes          | Yes          | Yes          | Yes          | Yes          | Yes          | Yes          | Yes          | Yes          | Yes          | Yes          |
| Embedding normalization (TransE) | -            | -            | No           | -            | -            | -            | -            | -            | -            | -            | -            | -            |
| Entity                           | -            | -            | No           | -            | -            | -            | -            | -            | -            | -            | -            | -            |
| Relation                         | -            | -            | No           | -            | -            | -            | -            | -            | -            | -            | -            | -            |
| Dropout                          | -            | -            | -            | -            | -            | -            | -            | -            | -            | -            | -            | -            |
| Entity embedding                 | 0.00         | 0.00         | 0.00         | 0.00         | 0.00         | 0.00         | 0.00         | 0.00         | 0.00         | 0.00         | 0.00         | 0.00         |
| Relation embedding               | 0.00         | 0.00         | 0.00         | 0.35         | 0.35         | 0.35         | 0.35         | 0.41         | 0.41         | 0.41         | 0.00         | 0.00         |
| Projection (ConvE)               | -            | -            | -            | -            | -            | -            | -            | 0.14         | 0.14         | 0.14         | -            | -            |
| Feature map (ConvE)              | -            | -            | -            | -            | -            | -            | -            | 0.05         | 0.05         | 0.05         | -            | -            |
| Embedding initialization         | XvUnif       | XvUnif       | XvUnif       | Normal       | Normal       | Normal       | Normal       | Normal       | Normal       | Normal       | XvUnif       | XvUnif       |
| Std. deviation (Normal)          | -            | -            | -            | 0.00564      | 0.00564      | 0.00564      | 0.00564      | 0.00003      | 0.00003      | 0.00003      | -            | -            |
| Interval (Unif)                  | -            | -            | -            | -            | -            | -            | -            | -            | -            | -            | -            | -            |
| Gain (XvNorm)                    | 1.00         | 1.00         | 1.00         | -            | -            | -            | -            | -            | -            | -            | 1.00         | 1.00         |
| Gain (XvUnif)                    | -            | -            | -            | -            | -            | -            | -            | -            | -            | -            | -            | -            |

Table 9: Best link prediction hyperparameter configurations for each model on ogbl-biokg

|                                  | RESICAL             |  | TransE              |  | DistMult            |  | CompLex             |  | ConvE               |  | RotatE              |  |
|----------------------------------|---------------------|--|---------------------|--|---------------------|--|---------------------|--|---------------------|--|---------------------|--|
| Embedding size                   | 128                 |  | 128                 |  | 128                 |  | 128                 |  | 128                 |  | 128                 |  |
| Training type                    | NegSamp             |  | NegSamp             |  | NegSamp             |  | NegSamp             |  | NegSamp             |  | NegSamp             |  |
| Reciprocal                       | No                  |  | No                  |  | No                  |  | No                  |  | Yes                 |  | No                  |  |
| No. subject samples (NegSamp)    | 8985                |  | 2539                |  | 8985                |  | 9193                |  | 9281                |  | 8985                |  |
| No. object samples (NegSamp)     | 7990                |  | 7092                |  | 7990                |  | 9096                |  | 9430                |  | 7990                |  |
| Label Smoothing (KvsAll)         | -                   |  | -                   |  | -                   |  | -                   |  | -                   |  | -                   |  |
| Loss                             | CE                  |  | CE                  |  | CE                  |  | CE                  |  | CE                  |  | CE                  |  |
| Margin (MR)                      | -                   |  | -                   |  | -                   |  | -                   |  | -                   |  | -                   |  |
| $L_p$ -norm (TransE)             | -                   |  | L1                  |  | -                   |  | -                   |  | -                   |  | -                   |  |
| Optimizer                        | Adagrad             |  | Adagrad             |  | Adagrad             |  | Adagrad             |  | Adagrad             |  | Adagrad             |  |
| Batch size                       | 1024                |  | 1024                |  | 1024                |  | 1024                |  | 1024                |  | 1024                |  |
| Learning rate                    | 0.10137             |  | 0.08972             |  | 0.10137             |  | 0.18781             |  | 0.05670             |  | 0.10137             |  |
| Scheduler patience               | 1                   |  | 4                   |  | 1                   |  | 2                   |  | 2                   |  | 1                   |  |
| $L_p$ regularization             | L2                  |  | L3                  |  | L2                  |  | L2                  |  | L2                  |  | L2                  |  |
| Entity emb. weight               | 2.33 <sup>-02</sup> |  | 3.32 <sup>-17</sup> |  | 2.33 <sup>-02</sup> |  | 3.76 <sup>-19</sup> |  | 9.03 <sup>-20</sup> |  | 2.33 <sup>-02</sup> |  |
| Relation emb. weight             | 1.90 <sup>-07</sup> |  | 8.04 <sup>-18</sup> |  | 1.90 <sup>-07</sup> |  | 2.00 <sup>-20</sup> |  | 4.34 <sup>-16</sup> |  | 1.90 <sup>-07</sup> |  |
| Frequency weighting              | Yes                 |  | Yes                 |  | Yes                 |  | Yes                 |  | Yes                 |  | Yes                 |  |
| Embedding normalization (TransE) | -                   |  | L2                  |  | -                   |  | -                   |  | -                   |  | -                   |  |
| Entity                           | -                   |  | No                  |  | -                   |  | -                   |  | -                   |  | -                   |  |
| Relation                         | -                   |  | -                   |  | -                   |  | -                   |  | -                   |  | -                   |  |
| Dropout                          | -                   |  | -                   |  | -                   |  | -                   |  | -                   |  | -                   |  |
| Entity embedding                 | 0.00                |  | 0.00                |  | 0.00                |  | 0.00                |  | 0.00                |  | 0.00                |  |
| Relation embedding               | 0.00                |  | 0.00                |  | 0.00                |  | 0.49                |  | 0.41                |  | 0.00                |  |
| Projection (ConvE)               | -                   |  | -                   |  | -                   |  | -                   |  | 0.14                |  | -                   |  |
| Feature map (ConvE)              | -                   |  | -                   |  | -                   |  | -                   |  | 0.05                |  | -                   |  |
| Embedding initialization         | XvUnif              |  | Unif.               |  | XvUnif              |  | Normal              |  | Normal              |  | XvUnif              |  |
| Std. deviation (Normal)          | -                   |  | -                   |  | -                   |  | 0.00003             |  | 0.00003             |  | -                   |  |
| Interval (Unif)                  | -                   |  | [-0.30, 0.30]       |  | -                   |  | -                   |  | -                   |  | -                   |  |
| Gain (XvNorm)                    | 1.00                |  | -                   |  | 1.00                |  | -                   |  | -                   |  | 1.00                |  |
| Gain (XvUnif)                    | -                   |  | -                   |  | -                   |  | -                   |  | -                   |  | -                   |  |

Table 10: Best link prediction hyperparameter configurations for each model on OpenBioLink



## References

- Antoine Bordes, Nicolas Usunier, Alberto Garcia-Duran, Jason Weston, and Oksana Yakhnenko. Translating embeddings for modeling multi-relational data. 2013. URL <https://papers.nips.cc/paper/5071-translating-embeddings-for-modeling-multi-relational-data>
- Sébastien Ferré. Application of concepts of neighbours to and knowledge graph completion. *Data Science*, Preprint:1–28, 2020. ISSN 2451-8492. doi: 10.3233/DS-200030. URL <https://doi.org/10.3233/DS-200030>. Preprint.
- Yulong Gu, Yu Guan, and Paolo Missier. Towards learning instantiated logical rules from knowledge graphs, 2020.
- Christian Meilicke, Melisachew Wudage Chekol, Daniel Ruffinelli, and Heiner Stuckenschmidt. Anytime bottom-up rule learning for knowledge graph completion. In Sarit Kraus, editor, *Proceedings of International Joint Conferences on Artificial Intelligence*, pages 3137–3143, California, aug 2019. ISBN 978-0-9992411-4-1. doi: 10.24963/ijcai.2019/435.
- Pouya Ghiasnezhad Omran, Kewen Wang, and Zhe Wang. Scalable rule learning via learning representation. In *Proceedings of the Twenty-Seventh International Joint Conference on Artificial Intelligence, IJCAI-18*, pages 2149–2155. International Joint Conferences on Artificial Intelligence Organization, 7 2018. doi: 10.24963/ijcai.2018/297. URL <https://doi.org/10.24963/ijcai.2018/297>.
- Andrea Rossi, Denilson Barbosa, Donatella Firmani, Antonio Martinata, and Paolo Merialdo. Knowledge graph embedding for link prediction: A comparative analysis. *ACM Trans. Knowl. Discov. Data*, 15(2), January 2021. ISSN 1556-4681. doi: 10.1145/3424672. URL <https://doi.org/10.1145/3424672>.
- Daniel Ruffinelli, Samuel Broscheit, and Rainer Gemulla. You can teach an old dog new tricks! on training knowledge graph embeddings. In *International Conference on Learning Representations*, 2020. URL <https://openreview.net/forum?id=BkxSmlBFvr>.
- Ali Sadeghian, Mohammadreza Armandpour, Patrick Ding, and Daisy Zhe Wang. Drum: End-to-end differentiable rule mining on knowledge graphs. In H. Wallach, H. Larochelle, A. Beygelzimer, F. d'Alché-Buc, E. Fox, and R. Garnett, editors, *Advances in Neural Information Processing Systems*, volume 32. Curran Associates, Inc., 2019.
- Zhanqiu Zhang, Jianyu Cai, Yongdong Zhang, and Jie Wang. Learning hierarchy-aware knowledge graph embeddings for link prediction. *Proceedings of the AAAI Conference on Artificial Intelligence*, 34(03):3065–3072, Apr. 2020. doi: 10.1609/aaai.v34i03.5701. URL <https://ojs.aaai.org/index.php/AAAI/article/view/5701>.
